# Supplementary material for: Mucins trigger dispersal of Pseudomonas aeruginosa biofilms
Source: PubMed Central journal article supplement (PMC6180003; doi:10.1038/s41522-018-0067-0), 2018-10-10
Supplement: 41522_2018_67_MOESM1_ESM.pdf [file 41522_2018_67_MOESM1_ESM.pdf]

**Supplemental Information for “Mucins trigger dispersal of *Pseudomonas aeruginosa* biofilms”**

Julia Y Co<sup>a,b\*</sup>, Gerardo Cárcamo-Oyarce<sup>c\*</sup>, Nicole Billings<sup>a</sup>, Kelsey M Wheeler<sup>a,b</sup>, Scott C Grindy<sup>d</sup>, Niels Holten-Andersen<sup>d</sup>, Katharina Ribbeck<sup>a#</sup>

<sup>a</sup>Department of Biological Engineering, Massachusetts Institute of Technology, Cambridge, Massachusetts, USA; <sup>b</sup>Microbiology Graduate Program, Massachusetts Institute of Technology, Cambridge, Massachusetts, USA; <sup>c</sup>Research Laboratory of Electronics, Massachusetts Institute of Technology, Cambridge, Massachusetts, USA; <sup>d</sup>Department of Materials Science and Engineering, Massachusetts Institute of Technology, Cambridge, Massachusetts, USA

## Supplemental Figures

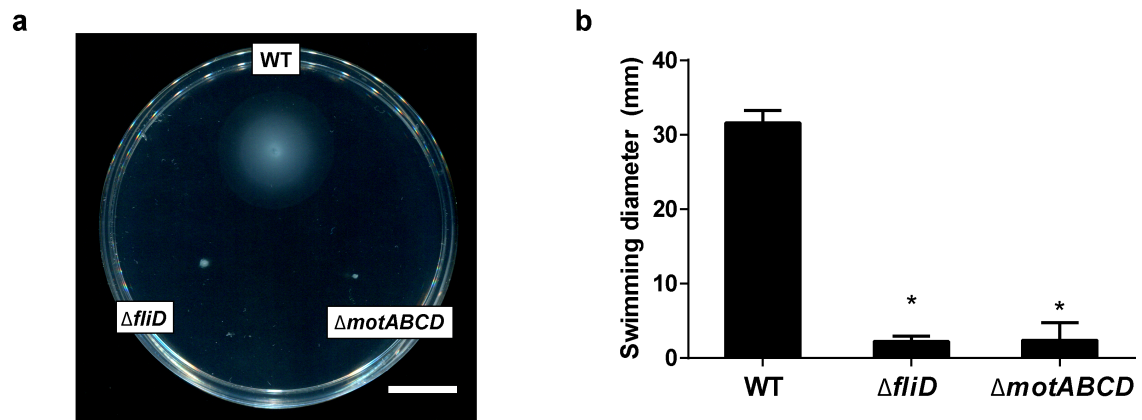

**Figure S1.** *P. aeruginosa* flagella-deficient mutants exhibit impaired swimming motility. (a) *P. aeruginosa* cells were inoculated onto a swim agar plate (M8 medium with 0.3% agar) and imaged after 24 h at room temperature. (b) Diameters of swim zones were measured for each strain. Error bars represent standard error ( $n = 4$ ). \* $P \leq 0.05$  versus WT, unpaired Student's  $t$  test.

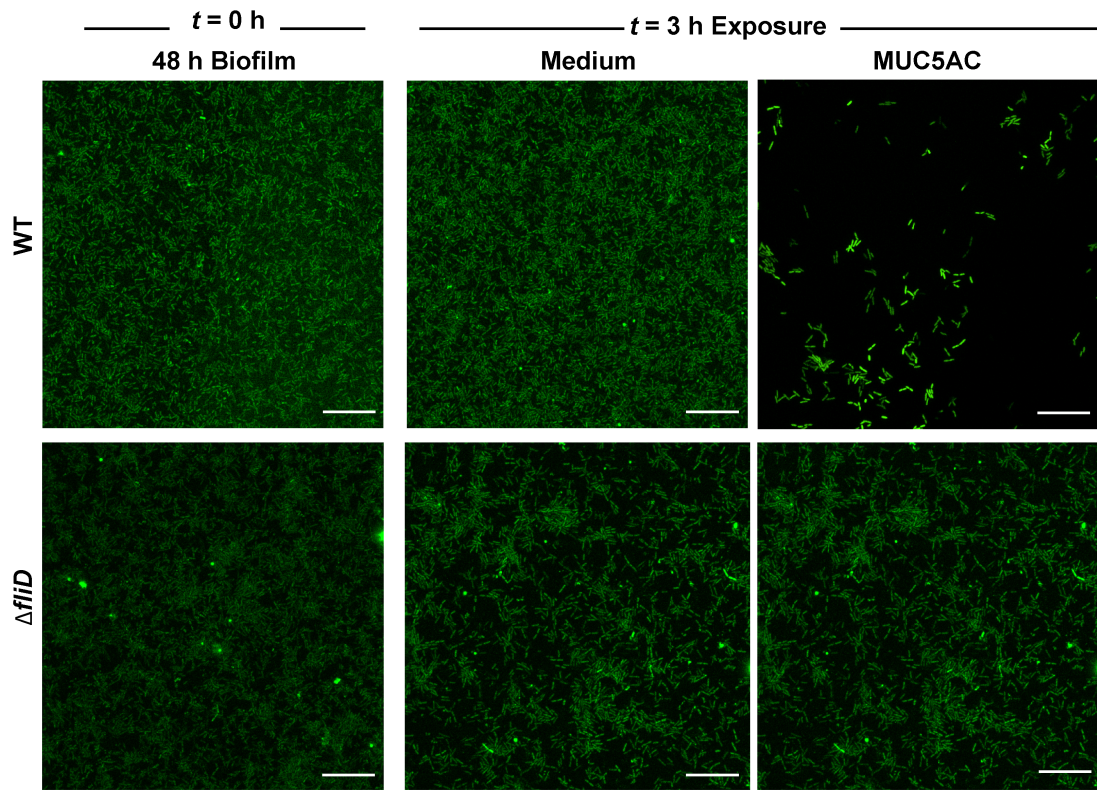

**Figure S2.** *P. aeruginosa* flagellar motility is required for mucin-induced biofilm dispersion. PAO1-GFP (WT) and PAO1 $\Delta$ *fliD*-GFP biofilms (48 h) were exposed to ABTG medium with or without 0.5% mucins. Scale bars = 20  $\mu$ m.

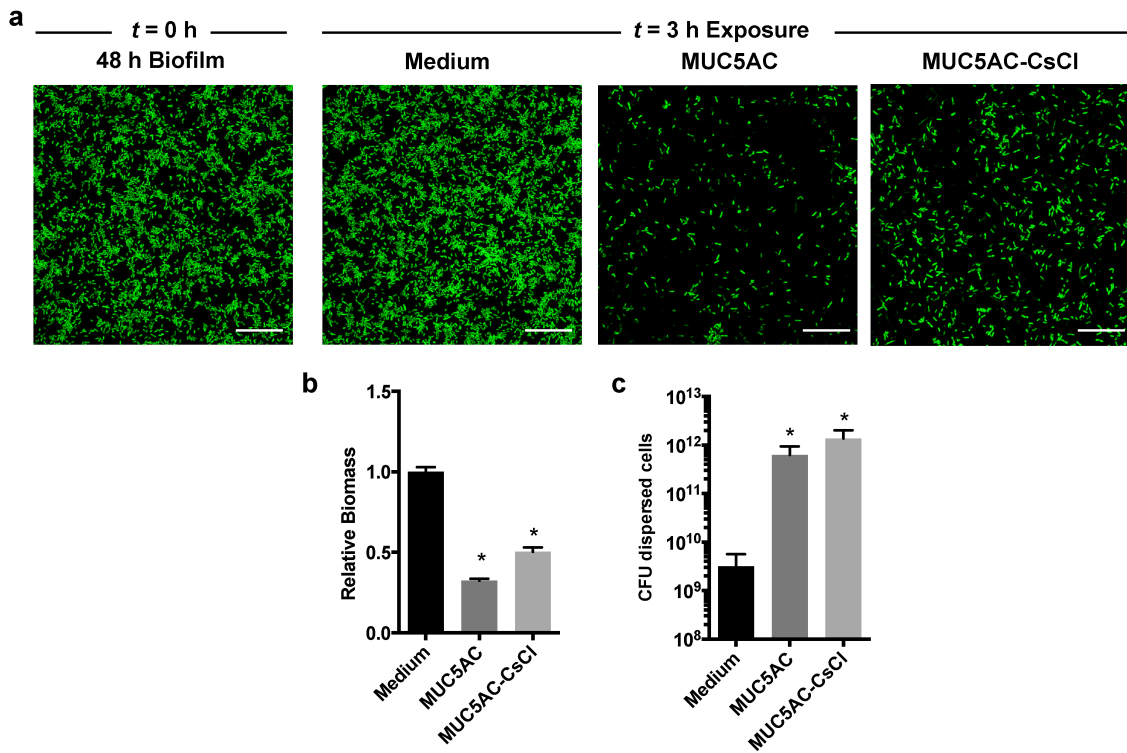

**Figure S3.** CsCl-purified mucin induces dispersal of *P. aeruginosa* biofilms under static growth conditions. (a) Live confocal imaging and (b) biofilm biomass quantification of 48 h PAO1-GFP biofilms before ( $t = 0$  h) and after ( $t = 3$  h) exposure to ABTG minimal medium, ABTG medium + 0.5% mucins, or ABTG medium + 0.5% CsCl-purified mucins. Scale bars = 20  $\mu$ m. Values are normalized to biofilm biomass before exposure. Error bars represent standard error ( $n \geq 3$ ).  $*P \leq 0.05$ , unpaired Student's  $t$  test. (c) Exposure to CsCl-purified mucin increases the number of dispersed cells from *P. aeruginosa* biofilms. Colony-forming units (CFUs) were counted to determine cell viability. Error bars represent standard error ( $n = 3$ ).
